# Supplementary material
Source: Springer Nature journal article supplement (https://www.springermedizin.de/resource/supplementary/12885_2006_575_MOESM1_ESM.pdf/9469806)
Supplement: MOESM1 [file 9469806]

**Variables in the Equation**

|           | B     | SE   | Wald  | df | Sig. | Exp(B) |
|-----------|-------|------|-------|----|------|--------|
| CGH8q     | 1.637 | .553 | 8.767 | 1  | .003 | 5.138  |
| age_3     | 1.101 | .473 | 5.426 | 1  | .020 | 3.006  |
| resection | .870  | .582 | 2.240 | 1  | .134 | 2.388  |
| M_status  | .292  | .444 | .434  | 1  | .510 | 1.339  |

Progression-Free  
Survival

**Variables in the Equation**

|           | B     | SE   | Wald  | df | Sig. | Exp(B) |
|-----------|-------|------|-------|----|------|--------|
| CGH8q     | 1.531 | .615 | 6.205 | 1  | .013 | 4.624  |
| age_3     | .981  | .541 | 3.286 | 1  | .070 | 2.667  |
| resection | 1.315 | .583 | 5.083 | 1  | .024 | 3.725  |
| M_status  | .341  | .466 | .535  | 1  | .464 | 1.406  |

Overall Survival
